# Supplementary material for: The interplay between membrane lipids and phospholipase A family members in grapevine resistance against Plasmopara viticola
Source: PubMed Central journal article supplement (PMC6162203; doi:10.1038/s41598-018-32559-z), 2018-09-28
Supplement: 41598_2018_32559_MOESM1_ESM.pdf [file 41598_2018_32559_MOESM1_ESM.pdf]

# The interplay between membrane lipids and phospholipase A family members in grapevine resistance against *Plasmopara viticola*

Gonçalo Laureano <sup>a</sup>, Joana Figueiredo <sup>abc\*</sup>, Ana Rita Cavaco <sup>a\*</sup>, Bernardo Duarte <sup>d</sup>, Isabel Caçador <sup>d</sup>, Rui Malhó <sup>a</sup>, Marta Sousa Silva <sup>bc</sup>, Ana Rita Matos <sup>a†</sup>, Andreia Figueiredo <sup>a†#</sup>

<sup>a</sup> *Biosystems & Integrative Sciences Institute (BioISI), Faculdade de Ciências, Universidade de Lisboa, Campo Grande, 1749-016 Lisboa, Portugal*

<sup>b</sup> *Laboratório de FTICR e Espectrometria de Massa Estrutural, Faculdade de Ciências, Universidade de Lisboa, Campo Grande, 1749-016 Lisboa, Portugal*

<sup>c</sup> *Centro de Química e Bioquímica, Faculdade de Ciências, Universidade de Lisboa, Campo Grande, 1749-016 Lisboa, Portugal*

<sup>d</sup> *MARE - Marine and Environmental Sciences Centre, Faculdade de Ciências, Universidade de Lisboa, Campo Grande, 1749-016 Lisboa, Portugal*

\* These authors contributed equally in this paper

† These authors are co-senior authors in this paper

Corresponding author:

#Andreia Figueiredo, at Biosystems & Integrative Sciences Institute (BioISI), Faculdade de Ciências da Universidade de Lisboa, 1749-016 Lisboa, Portugal. e-mail address: [aafigueiredo@fc.ul.pt](mailto:aafigueiredo@fc.ul.pt)

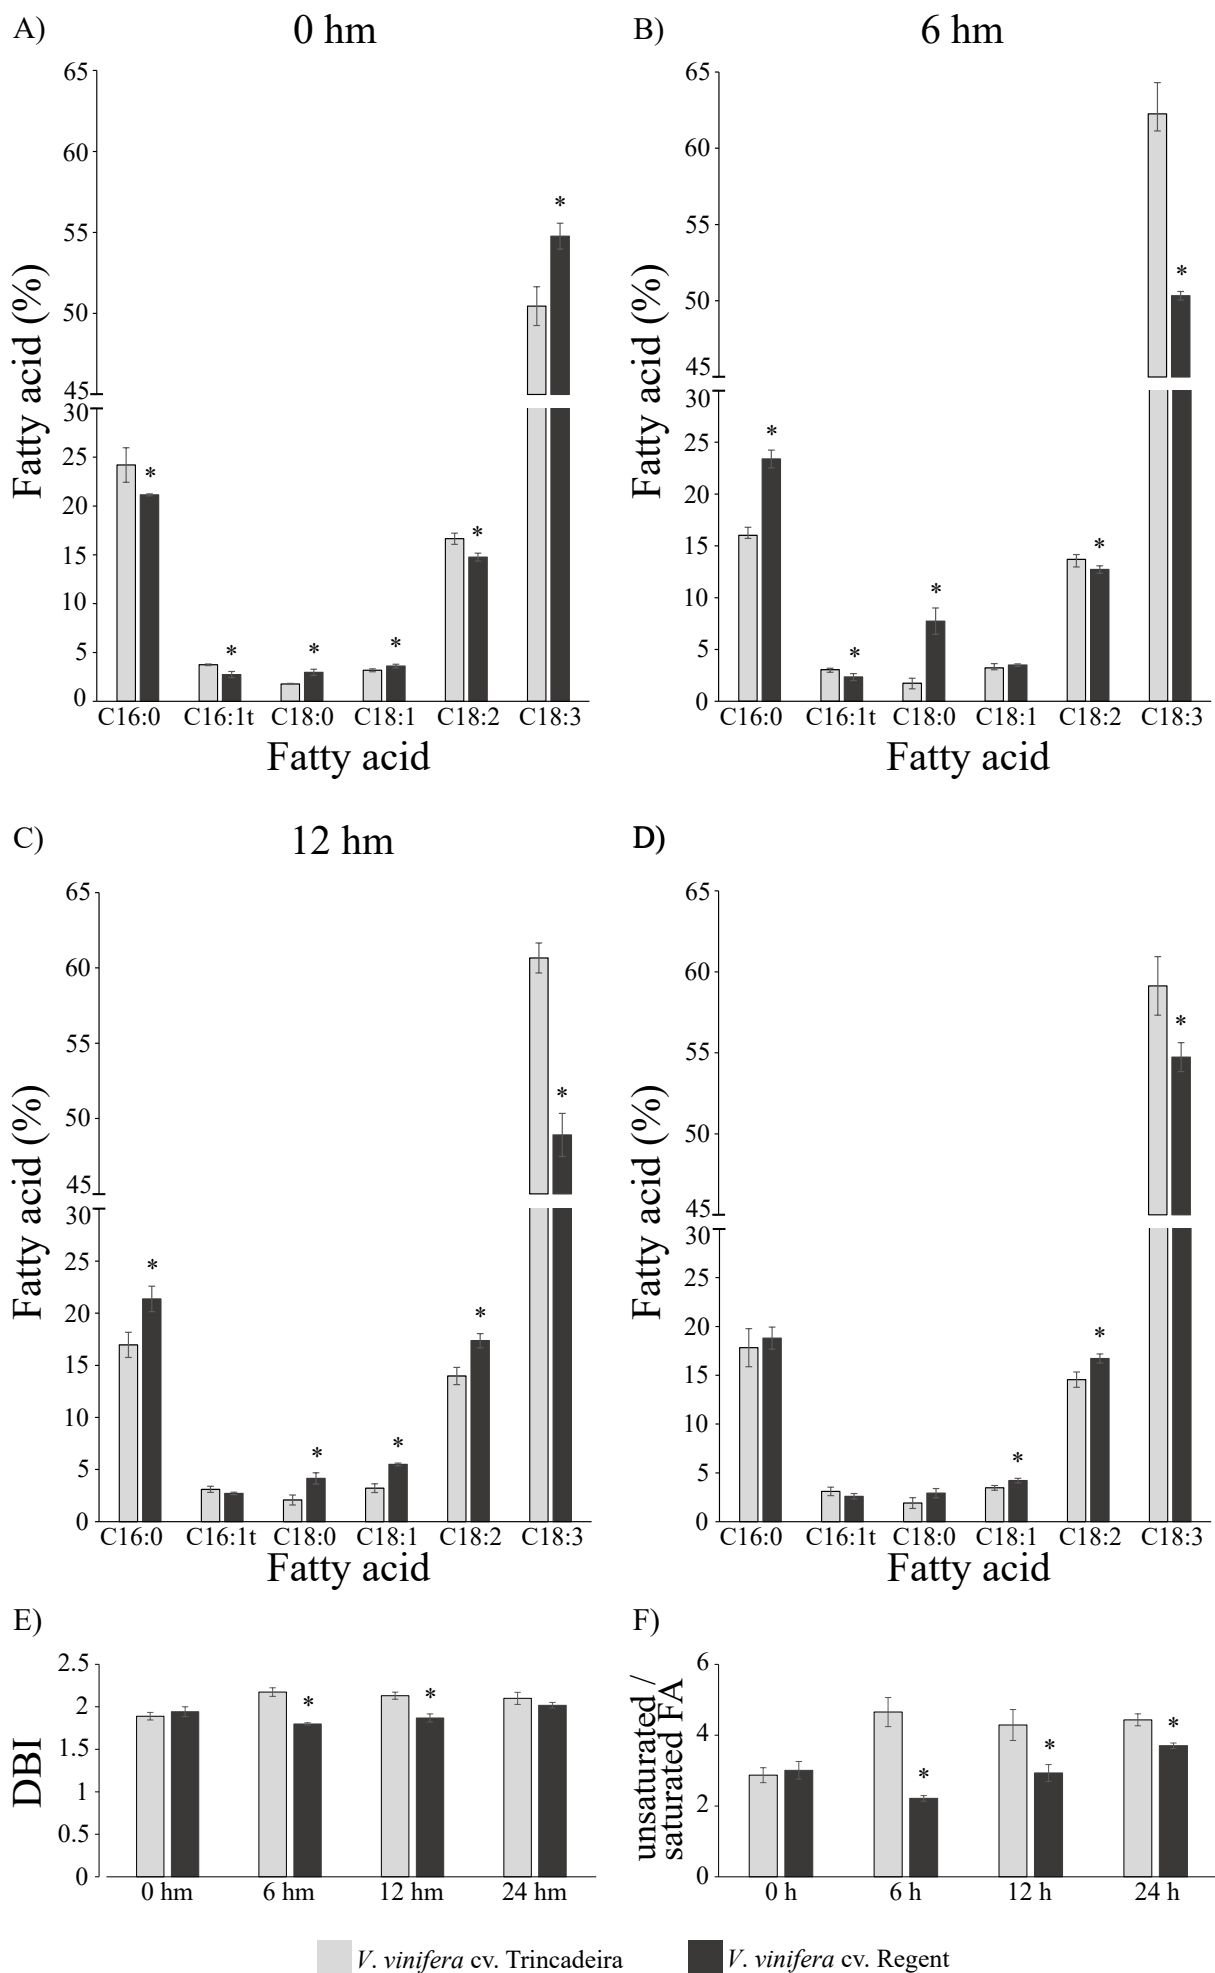

**Supplementary Figure S1-** Fatty acid composition between *V. vinifera* cv. Trincadeira (light grey) and *V. vinifera* cv. Regent (dark grey) mock inoculated leaves at 0 (A), 6 (B), 12 (C) and 24 (D) hours; E) Double bound index (DBI); F) Ratio between unsaturated and saturated FA. Values correspond to average relative percentage  $\pm$  standard error, n = 4; Asterisks indicate significant differences ( $p < 0.05$ ).

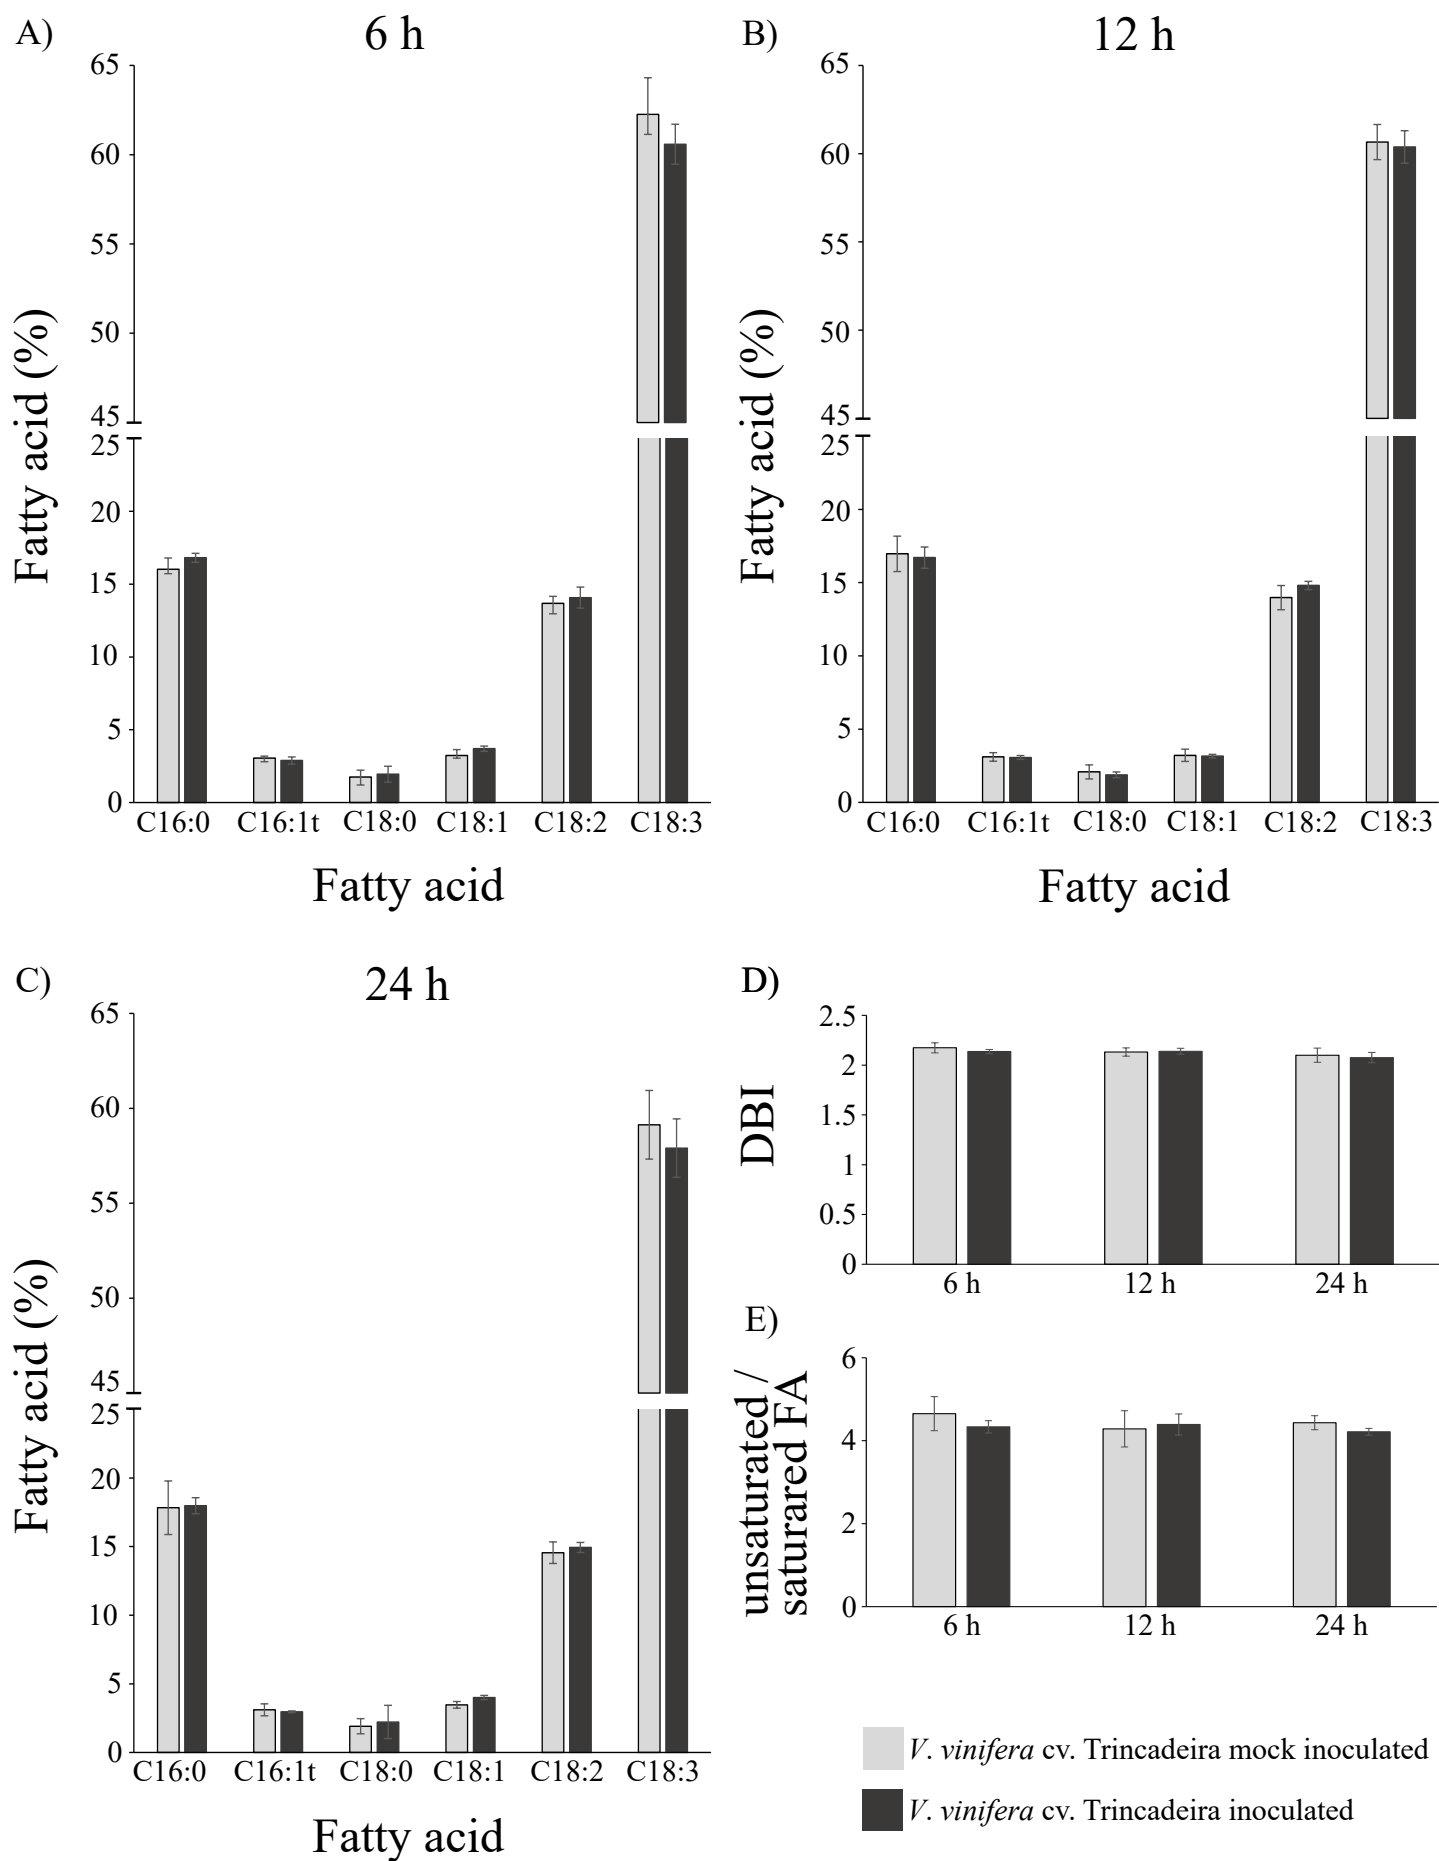

**Supplementary Figure S2** - Fatty acid composition of *V. vinifera* cv. Trincadeira mock inoculated (light grey) and inoculated (dark grey) leaves with *P. viticola* at 6 (A), 12 (B) and 24 (C) hours; D) Double bound index (DBI); E) Ratio between unsaturated and saturated FA. Values correspond to average relative percentage  $\pm$  standard error, n = 4; Asterisks indicate significant differences ( $p < 0.05$ ).

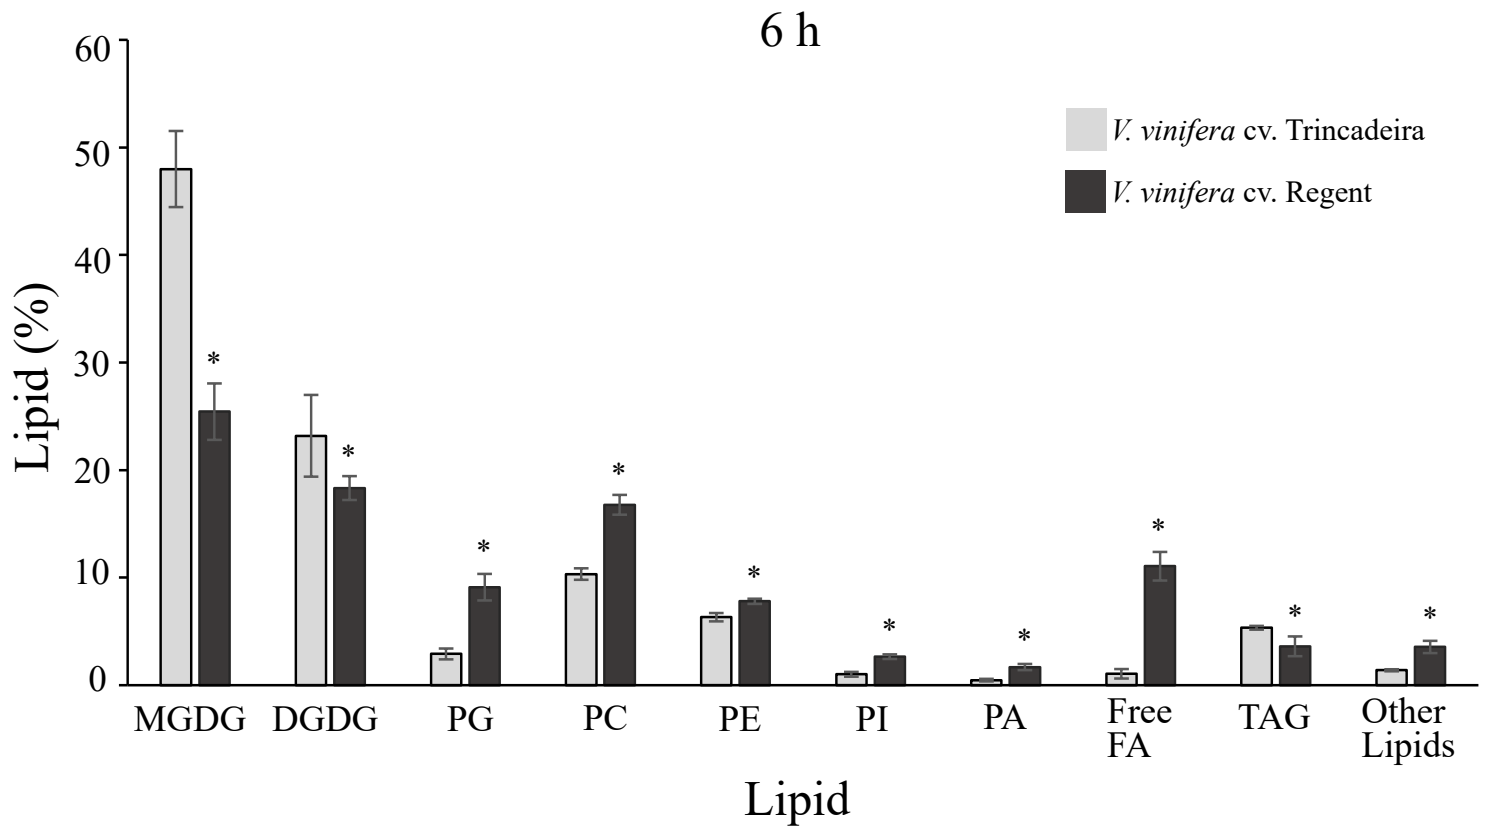

**Supplementary Figure S3** - Lipid composition of *V. vinifera* cv. Trincadeira (light grey) and Regent (dark grey) mock inoculated leaves at 6 hours. Values correspond to average relative percentage  $\pm$  standard error,  $n = 3$ ; Asterisks indicate significant differences ( $p < 0.05$ ). Abbreviations: monogalactosyldiacylglycerol (MGDG), digalactosyldiacylglycerol (DGDG), phosphatidylglycerol (PG), phosphatidylcholine (PC), phosphatidylethanolamine (PE), phosphatidylglycerol (PI), phosphatidic acid (PA), free fatty acids (FA) and triacylglycerol (TAG).

6 h

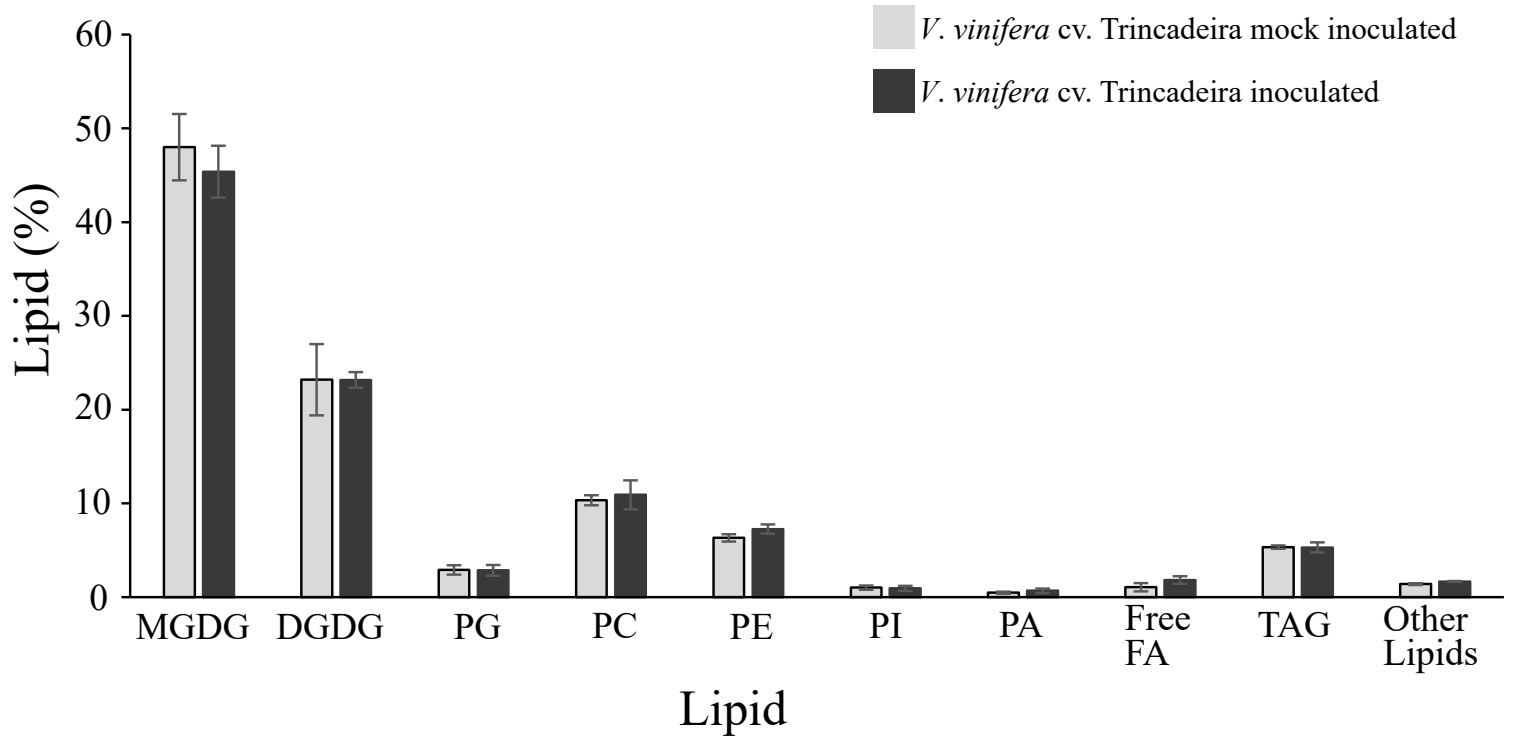

**Supplementary Figure S4** - Lipid composition of *V. vinifera* cv. Trincadeira mock inoculated (hm) and inoculated (hpi) leaves at 6 hours. Values correspond to average relative percentage  $\pm$  standard error,  $n = 3$ ; Asterisks indicate significant differences ( $p < 0.05$ ). Abbreviations: monogalactosyldiacylglycerol (MGDG), digalactosyldiacylglycerol (DGDG), phosphatidylglycerol (PG), phosphatidylcholine (PC), phosphatidylethanolamine (PE), phosphatidylglycerol (PI), phosphatidic acid (PA), free fatty acids (FA) and triacylglycerol (TAG).

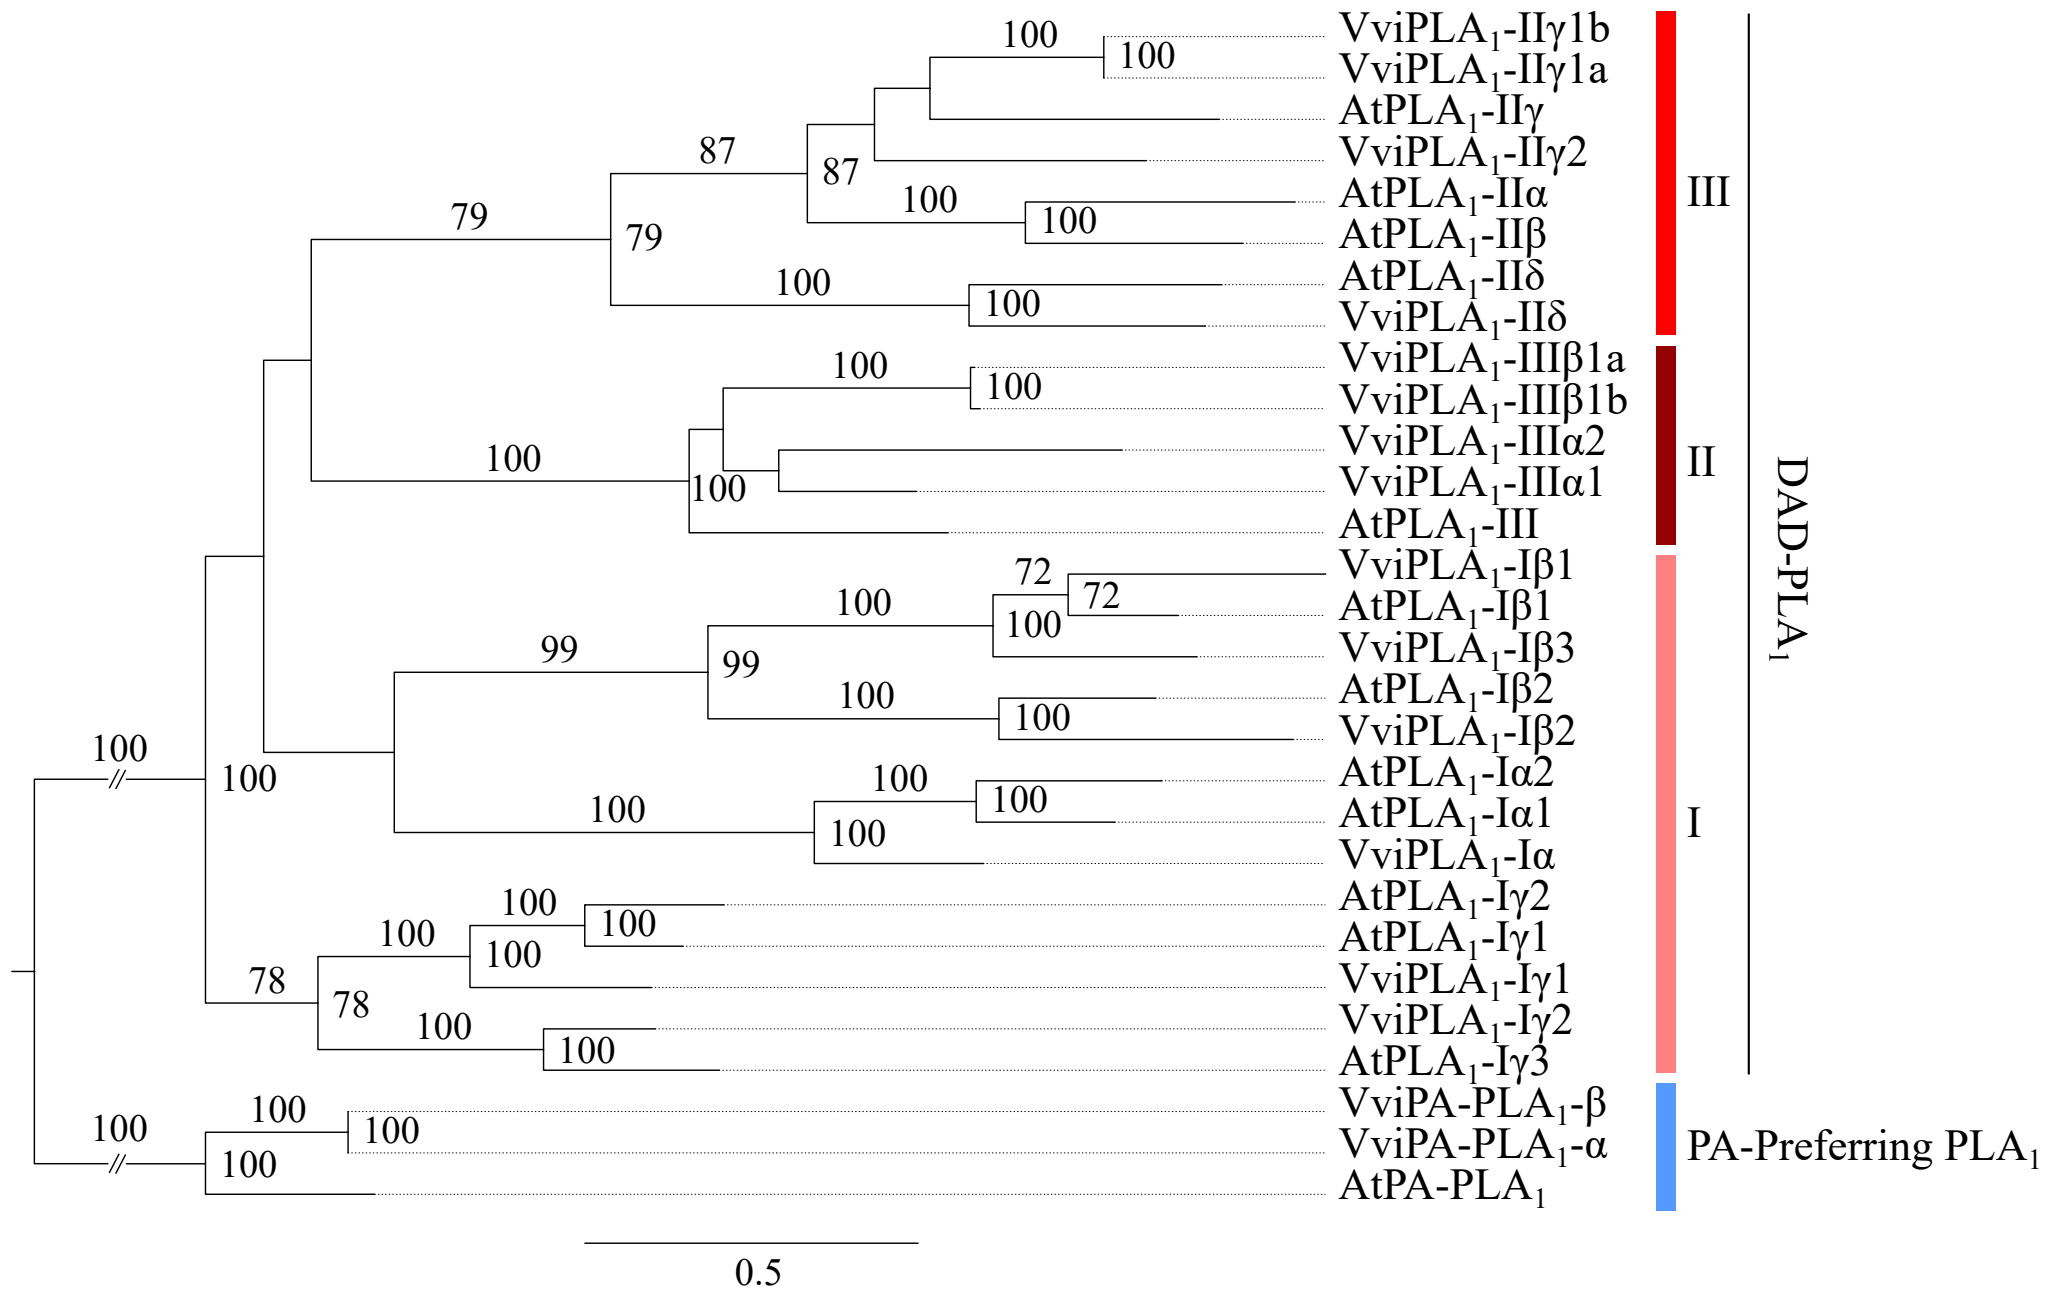

**Supplementary Figure S5** - Maximum likelihood phylogenetic tree of the 16 from *Vitis vinifera* PLA<sub>1</sub> proteins and 13 PLA<sub>1</sub> proteins from *Arabidopsis thaliana*. Scale bar represents the number of estimated changes per branch length. The root was truncated with double dash totalling 1.5 changes per branch length.

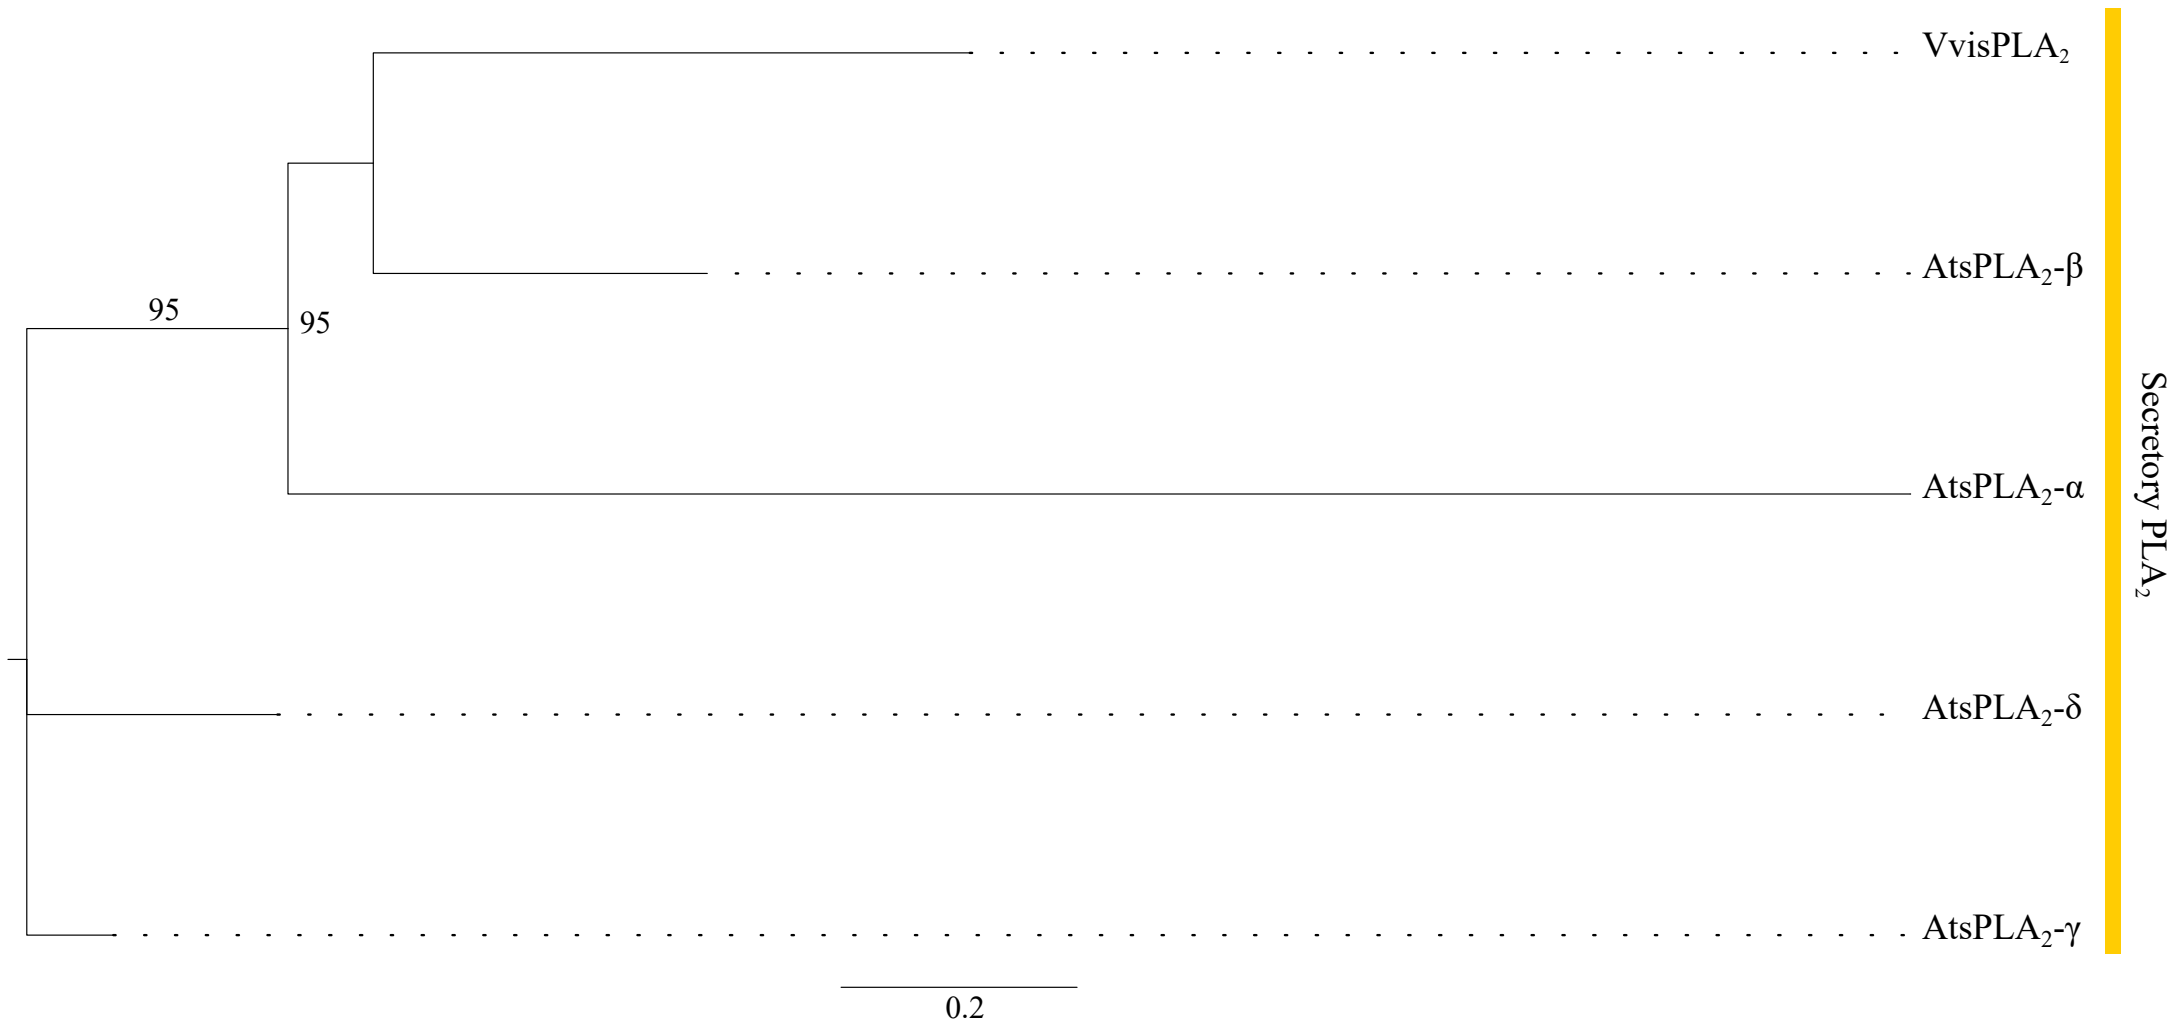

**Supplementary Figure S6** - Maximum likelihood phylogenetic tree of the 1 from *Vitis vinifera* secretory PLA proteins and 4 PLA proteins from *Arabidopsis thaliana*. Scale bar represents the number of estimated changes per branch length

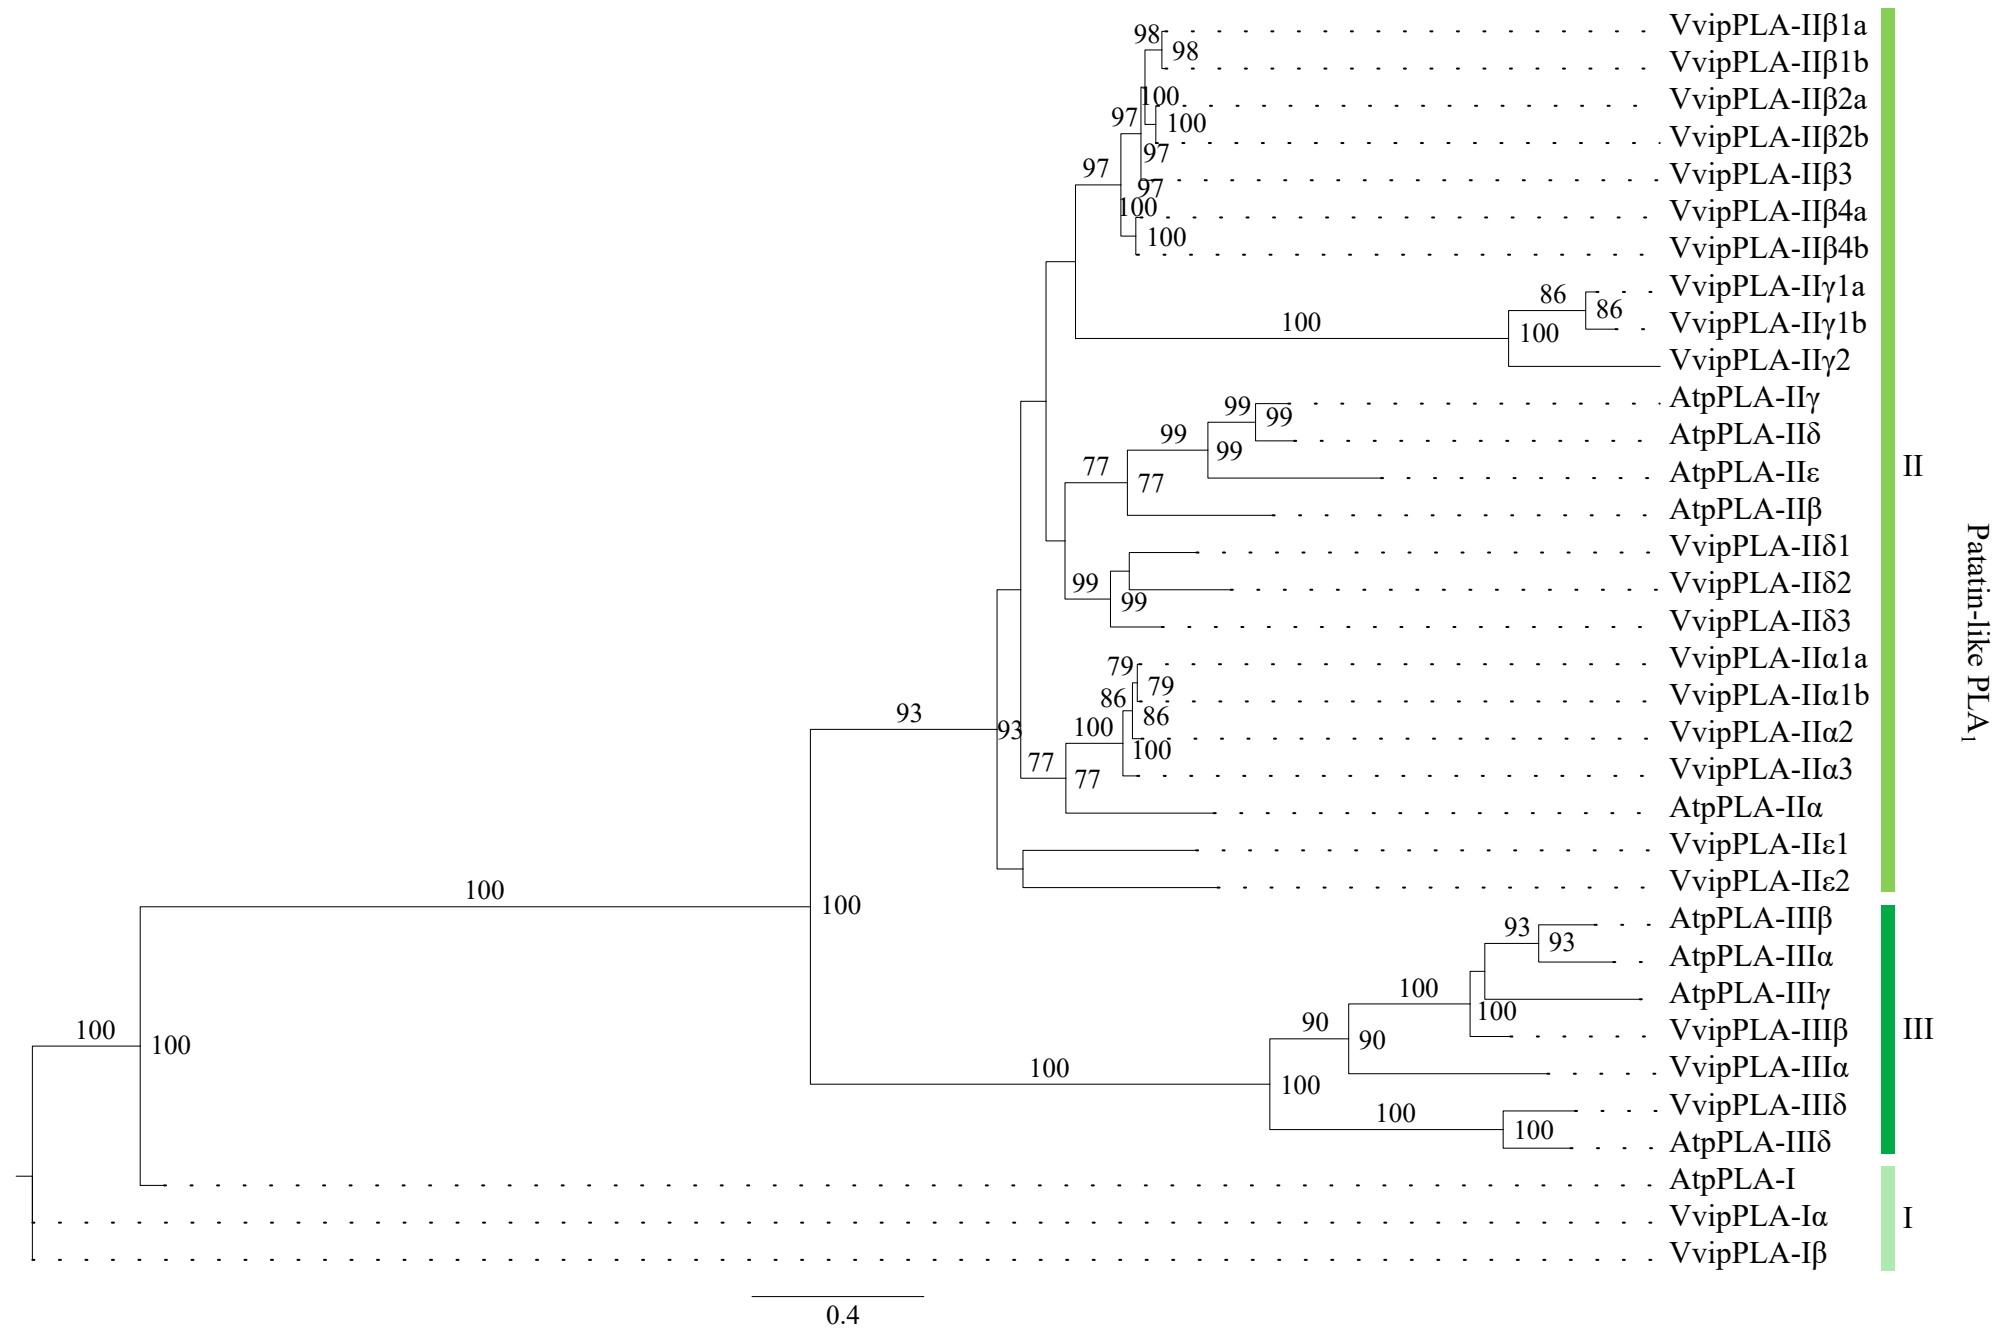

**Supplementary Figure S7** - Maximum likelihood phylogenetic tree of the 24 from *Vitis vinifera* patatin-like PLA proteins and 10 PLA proteins from *Arabidopsis thaliana*. Scale bar represents the number of estimated changes per branch length.



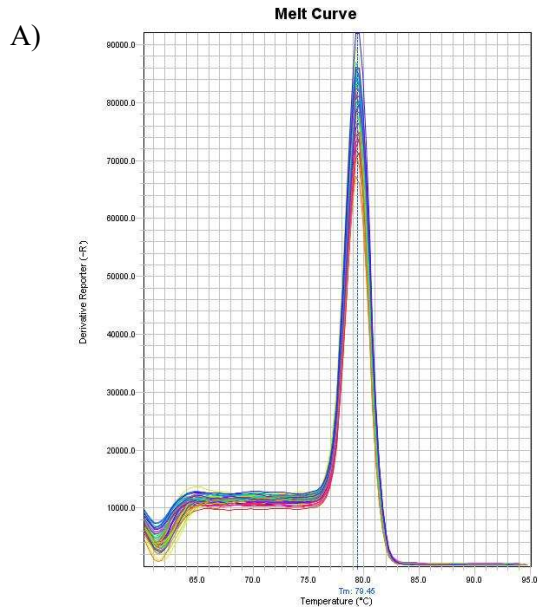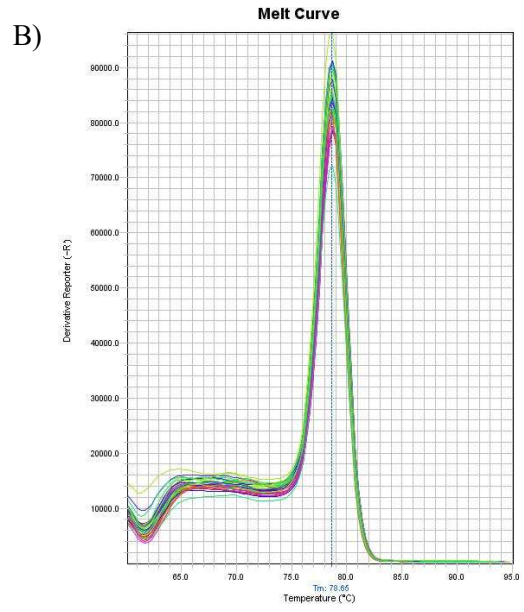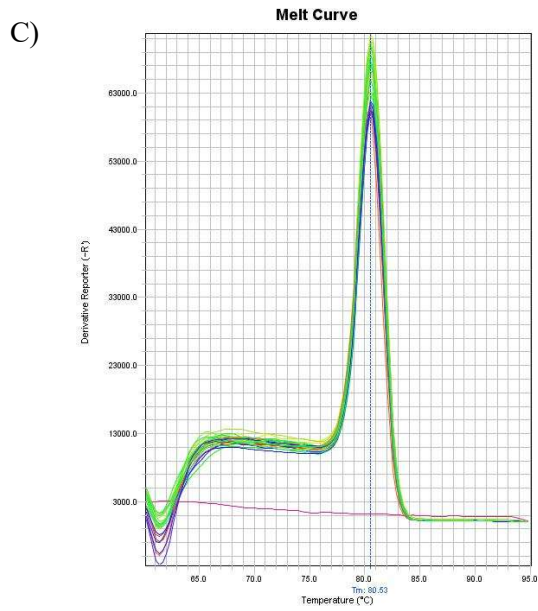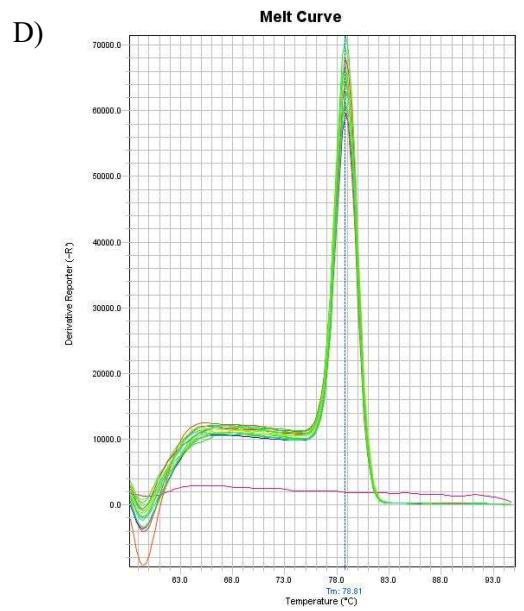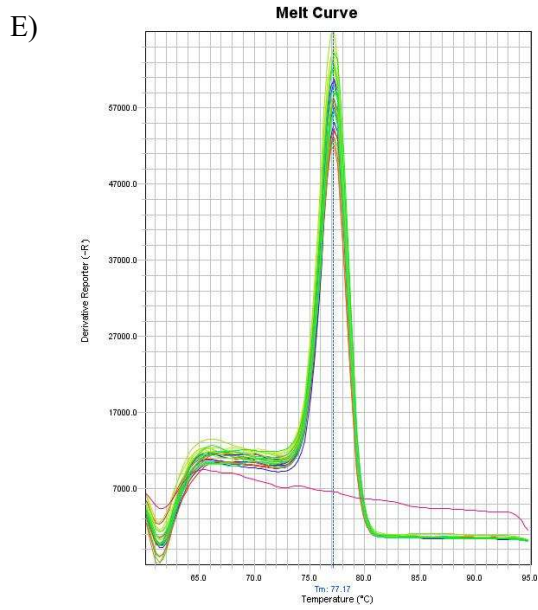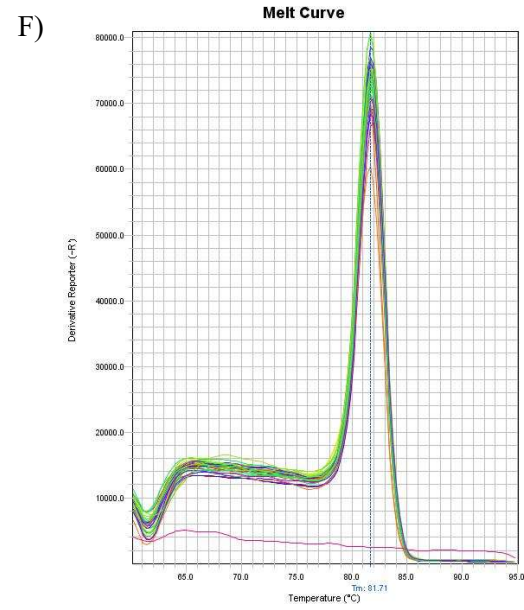

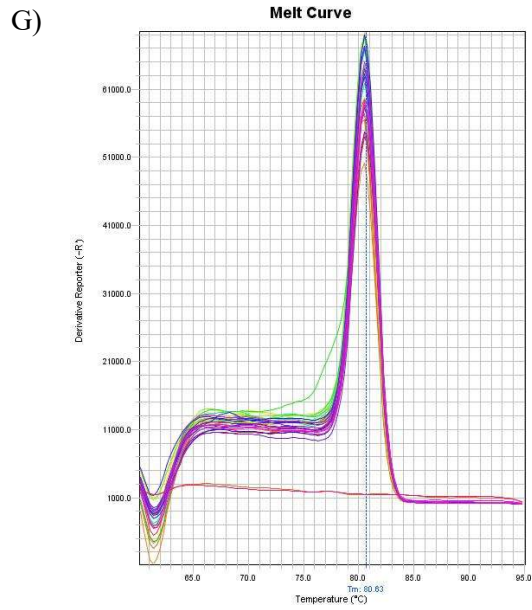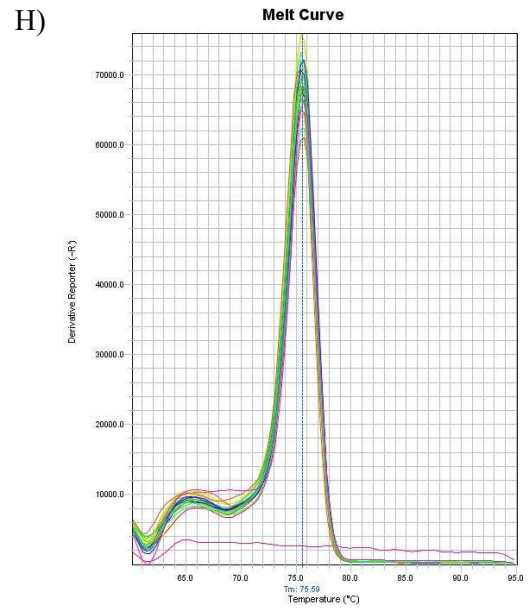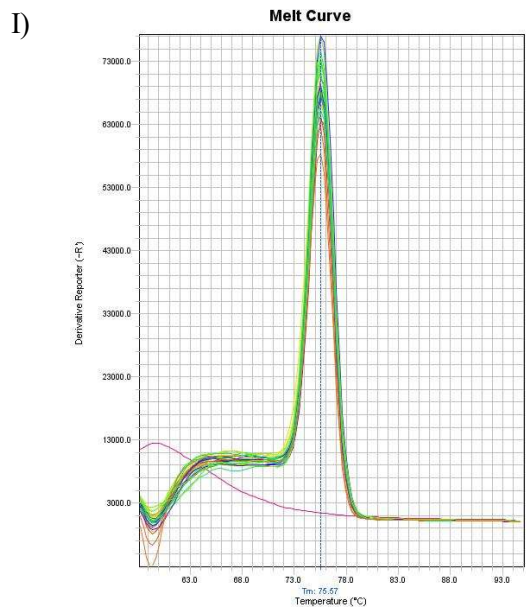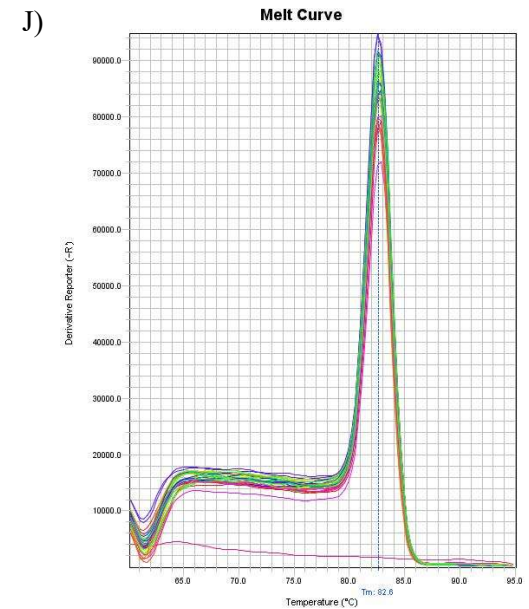

**Supplementary Figure S8** - Melting curves of targeted genes. A) *EF1α*; B) *UBQ*; C) *VviPLA1-Iβ1*; D) *VviPLA1-Iγ1*; E) *VviPLA1-IIδ*; F) *VvisPLA2*; G) *VvipPLA-I*; H) *VvipPLA-IIβ*; I) *VvipPLA-IIδ2*; J) *VvipPLA-III*.

| Trincadeira  |      | C16:0 | C16:1t     | C18:0        | C18:1       | C18:2 | C18:3 | DBI        | C18:3/18:2   |
|--------------|------|-------|------------|--------------|-------------|-------|-------|------------|--------------|
| MGDG         | M    | 2.3   | 0          | 0.4          | 0.7         | 3.6   | 93.0  | 2.9        | 25.8         |
|              |      | ±     |            | ±            | ±           | ±     | ±     | ±          | ±            |
|              | 0.1  |       | 0.1        | 0.2          | 0.0         | 0.2   | 0.0   | 0.1        |              |
|              | ±    |       | ±          | ±            | ±           | ±     | ±     | ±          |              |
| DGDG         | M    | 2.2   | 0          | 0.4          | 1.1         | 3.7   | 92.7  | 2.9        | <b>25.0*</b> |
|              |      | ±     |            | ±            | ±           | ±     | ±     | ±          | ±            |
|              | 0.4  |       | 0.0        | 0.2          | 0.1         | 0.5   | 0.0   | <b>0.3</b> |              |
|              | ±    |       | ±          | ±            | ±           | ±     | ±     | ±          |              |
| PC           | M    | 20.4  | 0          | 2.1          | 1.1         | 3.0   | 73.5  | 2.3        | 25.4         |
|              |      | ±     |            | ±            | ±           | ±     | ±     | ±          | ±            |
|              | 4.2  |       | 0.7        | 0.2          | 0.4         | 5.4   | 0.2   | 4.9        |              |
|              | ±    |       | ±          | ±            | ±           | ±     | ±     | ±          |              |
| PE           | M    | 20.5  | 0          | 1.6          | 1.0         | 2.5   | 74.3  | 2.3        | 29.6         |
|              |      | ±     |            | ±            | ±           | ±     | ±     | ±          | ±            |
|              | 1.0  |       | 0.1        | 0.1          | 0.1         | 0.8   | 0.0   | 0.7        |              |
|              | ±    |       | ±          | ±            | ±           | ±     | ±     | ±          |              |
| TAG          | M    | 36.1  | 0          | 5.1          | 6.5         | 33.5  | 18.8  | 1.3        | 0.6          |
|              |      | ±     |            | ±            | ±           | ±     | ±     | ±          | ±            |
|              | 1.9  |       | 1.0        | 0.5          | 2.0         | 1.4   | 0.1   | 0.0        |              |
|              | ±    |       | ±          | ±            | ±           | ±     | ±     | ±          |              |
| PG           | M    | 36.4  | 0          | 5.0          | 7.3         | 33.6  | 17.7  | 1.3        | <b>0.5*</b>  |
|              |      | ±     |            | ±            | ±           | ±     | ±     | ±          | ±            |
|              | 4.7  |       | 0.8        | 0.5          | 3.2         | 1.8   | 0.1   | <b>0.0</b> |              |
|              | ±    |       | ±          | ±            | ±           | ±     | ±     | ±          |              |
| Other Lipids | M    | 42.9  | 0          | 3.7          | 1.2         | 40.7  | 12.6  | 1.2        | 0.3          |
|              |      | ±     |            | ±            | ±           | ±     | ±     | ±          | ±            |
|              | 6.2  |       | 1.3        | 1.6          | 3.8         | 2.2   | 0.2   | 0.0        |              |
|              | ±    |       | ±          | ±            | ±           | ±     | ±     | ±          |              |
| PA           | M    | 40.2  | 0          | 2.9          | 2.2         | 41.8  | 12.9  | 1.2        | 0.3          |
|              |      | ±     |            | ±            | ±           | ±     | ±     | ±          | ±            |
|              | 3.3  |       | 0.0        | 0.2          | 2.6         | 0.9   | 0.1   | 0.0        |              |
|              | ±    |       | ±          | ±            | ±           | ±     | ±     | ±          |              |
| PI           | M    | 14.4  | 0          | 4.8          | 4.4         | 42.4  | 34.0  | 1.9        | 0.8          |
|              |      | ±     |            | ±            | ±           | ±     | ±     | ±          | ±            |
|              | 0.1  |       | 0.3        | 0.2          | 0.1         | 0.3   | 0.0   | 0.0        |              |
|              | ±    |       | ±          | ±            | ±           | ±     | ±     | ±          |              |
| Free FA      | M    | 13.7  | 0          | 4.3          | <b>5.2*</b> | 41.3  | 34.3  | 1.9        | 0.8          |
|              |      | ±     |            | ±            | ±           | ±     | ±     | ±          | ±            |
|              | 0.8  |       | 0.6        | <b>0.6</b>   | 0.8         | 0.6   | 0.0   | 0.0        |              |
|              | ±    |       | ±          | ±            | ±           | ±     | ±     | ±          |              |
| MGDG         | M    | 34.7  | 34.4       | 3.8          | 13.8        | 4.1   | 8.3   | 0.4        | 2.0          |
|              |      | ±     | ±          | ±            | ±           | ±     | ±     | ±          | ±            |
|              | 5.3  | 2.4   | 0.6        | 2.5          | 0.8         | 2.9   | 0.1   | 0.3        |              |
|              | ±    | ±     | ±          | ±            | ±           | ±     | ±     | ±          |              |
| DGDG         | M    | 37.6  | 30.7       | 3.4          | 16.8        | 4.2   | 8.2   | 0.4        | 1.7          |
|              |      | ±     | ±          | ±            | ±           | ±     | ±     | ±          | ±            |
|              | 6.5  | 3.5   | 1.9        | 2.8          | 2.5         | 2.6   | 0.1   | 0.4        |              |
|              | ±    | ±     | ±          | ±            | ±           | ±     | ±     | ±          |              |
| PC           | M    | 32.1  | 0          | 19.8         | 12.8        | 25.0  | 16.5  | 1.1        | 0.6          |
|              |      | ±     |            | ±            | ±           | ±     | ±     | ±          | ±            |
|              | 4.2  |       | 4.2        | 3.3          | 4.2         | 4.0   | 0.2   | 0.1        |              |
|              | ±    |       | ±          | ±            | ±           | ±     | ±     | ±          |              |
| PE           | M    | 40.3  | 0          | <b>30.3*</b> | 10.0        | 14.5  | 7.7   | 0.6        | 0.7          |
|              |      | ±     |            | ±            | ±           | ±     | ±     | ±          | ±            |
|              | 5.0  |       | <b>3.2</b> | 1.9          | 4.0         | 6.3   | 0.2   | 0.0        |              |
|              | ±    |       | ±          | ±            | ±           | ±     | ±     | ±          |              |
| TAG          | M    | 28.9  | 0          | 13.9         | 0           | 47.3  | 7.9   | 1.2        | 0.3          |
|              |      | ±     |            | ±            | ±           | ±     | ±     | ±          | ±            |
|              | 13.3 |       | 18.2       |              | 25.3        | 11.2  | 0.7   | 0.3        |              |
|              | ±    |       | ±          | ±            | ±           | ±     | ±     | ±          |              |
| PG           | M    | 24.2  | 0          | 13.7         | 4.7         | 31.9  | 17.1  | 1.4        | 0.4          |
|              |      | ±     |            | ±            | ±           | ±     | ±     | ±          | ±            |
|              | 21.8 |       | 6.0        | 4.9          | 16.2        | 8.9   | 0.6   | 0.3        |              |
|              | ±    |       | ±          | ±            | ±           | ±     | ±     | ±          |              |
| Other Lipids | M    | 34.4  | 0          | 11.0         | 3.8         | 19.6  | 27.4  | 1.3        | 1.6          |
|              |      | ±     |            | ±            | ±           | ±     | ±     | ±          | ±            |
|              | 3.1  |       | 7.0        | 3.4          | 3.1         | 2.5   | 0.1   | 0.3        |              |
|              | ±    |       | ±          | ±            | ±           | ±     | ±     | ±          |              |
| PA           | M    | 33.6  | 0          | 14.8         | 4.3         | 18.7  | 25.4  | 1.1        | 1.6          |
|              |      | ±     |            | ±            | ±           | ±     | ±     | ±          | ±            |
|              | 3.9  |       | 6.0        | 1.8          | 1.9         | 4.2   | 0.1   | 0.3        |              |
|              | ±    |       | ±          | ±            | ±           | ±     | ±     | ±          |              |
| Free FA      | M    | 34.7  | 0          | 53.1         | 5.8         | 4.4   | 2.7   | 0.2        | 0.8          |
|              |      | ±     |            | ±            | ±           | ±     | ±     | ±          | ±            |
|              | 4.4  |       | 5.1        | 4.2          | 5.0         | 5.2   | 0.3   | 0.1        |              |
|              | ±    |       | ±          | ±            | ±           | ±     | ±     | ±          |              |
| MGDG         | M    | 39.6  | 0          | 51.3         | 5.5         | 5.2   | 2.0   | 0.2        | 0.6          |
|              |      | ±     |            | ±            | ±           | ±     | ±     | ±          | ±            |
|              | 2.4  |       | 2.7        | 0.6          | 0.7         | 3.9   | 0.1   | 0.7        |              |
|              | ±    |       | ±          | ±            | ±           | ±     | ±     | ±          |              |

**Supplementary Table S1** - Fatty acids content in each lipid class *V. vinifera* cv. Trincadeira mock inoculated (M) and inoculated (I) leaves with *P. viticola*. Values correspond to average relative percentage ± standard error, n = 3; Asterisks indicate significant differences (p<0.05).

| Regent       |              | C16:0        | C16:1t       | C18:0        | C18:1        | C18:2        | C18:3        | DBI          | C18:3/18:2   |
|--------------|--------------|--------------|--------------|--------------|--------------|--------------|--------------|--------------|--------------|
| MGDG         | M            | 6.5          |              | 1.9          | 2.2          | 3.9          | 85.5         | 2.7          | 22.1         |
|              |              | ±            | 0            | ±            | ±            | ±            | ±            | ±            | ±            |
|              | 0.7          |              | 0.2          | 1.4          | 0.1          | 2.0          | 0.0          | 1.0          |              |
|              | <b>3.2*</b>  |              | <b>0.8*</b>  | <b>0.6*</b>  | <b>3.4*</b>  | <b>92.0*</b> | <b>2.8*</b>  | <b>26.9*</b> |              |
| DGDG         | I            | ±            | 0            | ±            | ±            | ±            | ±            | ±            | ±            |
|              |              | <b>0.1</b>   |              | <b>0.0</b>   | <b>0.1</b>   | <b>0.1</b>   | <b>0.2</b>   | <b>0.0</b>   | <b>0.6</b>   |
|              | 24.2         |              | 3.4          | 1.4          | 3.0          | 67.9         | 2.1          | 23.7         |              |
|              | ±            | 0            | ±            | ±            | ±            | ±            | ±            | ±            |              |
| PC           | M            | 1.1          |              | 0.4          | 0.1          | 0.2          | 1.2          | 0.1          | 2.4          |
|              |              | 22.0         |              | <b>1.8*</b>  | <b>0.8*</b>  | <b>1.9*</b>  | <b>73.5*</b> | <b>2.2*</b>  | <b>38.7*</b> |
|              | ±            | 0            | ±            | ±            | ±            | ±            | ±            | ±            |              |
|              | <b>0.7</b>   |              | <b>0.1</b>   | <b>0.1</b>   | <b>0.0</b>   | <b>0.6</b>   | <b>0.0</b>   | <b>0.5</b>   |              |
| PE           | I            | 35.5         |              | 6.5          | 10.7         | 28.6         | 20.5         | 1.3          | 0.7          |
|              |              | ±            | 0            | ±            | ±            | ±            | ±            | ±            | ±            |
|              | 6.2          |              | 1.0          | 1.0          | 3.4          | 4.2          | 0.2          | 0.1          |              |
|              | <b>34.8</b>  |              | <b>4.2*</b>  | <b>8.5*</b>  | 32.4         | 19.9         | 1.3          | 0.6          |              |
| TAG          | M            | ±            | 0            | ±            | ±            | ±            | ±            | ±            | ±            |
|              |              | <b>0.3</b>   |              | <b>0.0</b>   | <b>0.0</b>   | 0.9          | 0.5          | 0.0          | 0.0          |
|              | 41.4         |              | 5.9          | 4.0          | 36.7         | 11.8         | 1.1          | 0.3          |              |
|              | ±            | 0            | ±            | ±            | ±            | ±            | ±            | ±            |              |
| PG           | I            | 10.0         |              | 0.6          | 0.6          | 7.3          | 3.4          | 0.2          | 0.0          |
|              |              | 45.5         |              | 4.2          | 3.7          | 37.6         | 9.7          | 1.1          | 0.3          |
|              | ±            | 0            | ±            | ±            | ±            | ±            | ±            | ±            |              |
|              | <b>8.9</b>   |              | <b>0.7</b>   | <b>0.4</b>   | <b>7.6</b>   | <b>2.3</b>   | <b>0.2</b>   | <b>0.0</b>   |              |
| Other Lipids | M            | 27.9         |              | 16.1         | 13.4         | 26.8         | 15.9         | 1.1          | 0.6          |
|              |              | ±            | 0            | ±            | ±            | ±            | ±            | ±            | ±            |
|              | 0.1          |              | 2.5          | 2.9          | 0.9          | 4.4          | 0.1          | 0.1          |              |
|              | <b>20.4*</b> |              | <b>10.1*</b> | 10.1         | <b>35.5*</b> | <b>26.5*</b> | 1.5          | 0.8          |              |
| PA           | I            | ±            | 0            | ±            | ±            | ±            | ±            | ±            | ±            |
|              |              | <b>1.8</b>   |              | <b>1.3</b>   | 1.2          | <b>2.6</b>   | <b>3.8</b>   | 0.1          | 0.1          |
|              | 36.5         | 33.9         | 4.0          | 19.5         | 4.4          | 4.7          | 0.4          | 1.1          |              |
|              | ±            | ±            | ±            | ±            | ±            | ±            | ±            | ±            |              |
| Free FA      | M            | 2.2          | 1.4          | 1.6          | 1.2          | 1.1          | 1.9          | 0.1          | 0.2          |
|              |              | 35.7         | 30.9         | 2.1          | 19.9         | 5.2          | 8.1          | 0.5          | 1.2          |
|              | ±            | ±            | ±            | ±            | ±            | ±            | ±            | ±            |              |
|              | <b>2.6</b>   | <b>1.3</b>   | <b>0.2</b>   | <b>0.6</b>   | <b>1.7</b>   | <b>2.4</b>   | <b>0.1</b>   | <b>0.2</b>   |              |
| PI           | I            | 28.4         |              | 21.9         | 10.3         | 23.1         | 16.3         | 1.1          | 0.7          |
|              |              | ±            | 0            | ±            | ±            | ±            | ±            | ±            | ±            |
|              | 2.0          |              | 1.1          | 2.0          | 0.0          | 1.2          | 0.1          | 0.1          |              |
|              | <b>34.6</b>  |              | <b>26.4*</b> | 8.1          | <b>18.2*</b> | <b>12.7*</b> | 0.8          | 0.7          |              |
| Free FA      | M            | ±            | 0            | ±            | ±            | ±            | ±            | ±            | ±            |
|              |              | <b>6.0</b>   |              | <b>0.1</b>   | 2.6          | <b>1.4</b>   | <b>2.1</b>   | 0.1          | 0.1          |
|              | 27.6         |              | 16.1         | 10.0         | 34.7         | 11.6         | 1.1          | 0.3          |              |
|              | ±            | 0            | ±            | ±            | ±            | ±            | ±            | ±            |              |
| Free FA      | I            | 4.7          |              | 2.6          | 2.4          | 6.6          | 2.9          | 0.2          | 0.0          |
|              |              | 32.8         |              | 12.1         | 6.6          | 34.4         | 14.9         | 1.2          | 0.4          |
|              | ±            | 0            | ±            | ±            | ±            | ±            | ±            | ±            |              |
|              | <b>5.0</b>   |              | <b>1.1</b>   | <b>1.8</b>   | <b>4.4</b>   | <b>2.8</b>   | <b>0.1</b>   | <b>0.1</b>   |              |
| Free FA      | M            | 52.9         |              | 10.9         | 4.2          | 15.8         | 13.5         | 0.8          | 0.9          |
|              |              | ±            | 0            | ±            | ±            | ±            | ±            | ±            | ±            |
|              | 5.0          |              | 2.3          | 2.1          | 3.2          | 3.7          | 0.2          | 0.1          |              |
|              | <b>59.2</b>  |              | <b>8.0*</b>  | 3.0          | 19.7         | 13.1         | 0.8          | 0.7          |              |
| Free FA      | I            | ±            | 0            | ±            | ±            | ±            | ±            | ±            | ±            |
|              |              | <b>7.7</b>   |              | <b>1.2</b>   | 1.8          | 3.8          | 3.4          | 0.2          | 0.0          |
|              | 35.3         |              | 56.5         | 3.5          | 2.8          | 2.0          | 0.2          | 0.7          |              |
|              | ±            | 0            | ±            | ±            | ±            | ±            | ±            | ±            |              |
| Free FA      | M            | 0.9          |              | 0.0          | 0.0          | 0.5          | 0.5          | 0.0          | 0.0          |
|              |              | <b>41.0*</b> |              | <b>49.8*</b> | 3.4          | 2.9          | <b>3.0*</b>  | 0.2          | <b>1.0*</b>  |
|              | ±            | 0            | ±            | ±            | ±            | ±            | ±            | ±            |              |
|              | <b>1.3</b>   |              | <b>1.6</b>   | 0.0          | 0.3          | <b>0.1</b>   | 0.0          | <b>0.1</b>   |              |

**Supplementary Table S2** - Fatty acids content in each lipid class of *V. vinifera* cv. Regent mock inoculated (M) and inoculated (I) leaves with *P. viticola*. Values correspond to average relative percentage ± standard error, n = 3; Asterisks indicate significant differences (p<0.05).

| Family                              | Group                             | Proposed nomenclature               | Locus                | Nucleotide                       | Protein                          | Chr.           | Introns | Protein length (aa) | Molecular weight (kDa) | pI       | Domain (Blast2GO)              | Subcellular location |
|-------------------------------------|-----------------------------------|-------------------------------------|----------------------|----------------------------------|----------------------------------|----------------|---------|---------------------|------------------------|----------|--------------------------------|----------------------|
| DAD PLA <sub>1</sub>                | I                                 | VviPLA <sub>1</sub> -I $\alpha$     | LOC100242894         | XM_002268106.2                   | XP_002268142.1                   | 5              | 0       | 446                 | 49.8                   | 7.04     | Lipase 3                       | Chloroplast          |
|                                     |                                   | VviPLA <sub>1</sub> -I $\beta$ 1    | LOC100242763         | XM_002270956.4                   | XP_002270992.2                   | 15             | 0       | 434                 | 48.7                   | 9.48     | Lipase 3                       | Chloroplast          |
|                                     |                                   | VviPLA <sub>1</sub> -I $\beta$ 2    | LOC100247003         | XM_010648953.2                   | XP_010647255.1                   | unknown        | 0       | 528                 | 59.1                   | 9.04     | Lipase 3                       | Chloroplast          |
|                                     |                                   | VviPLA <sub>1</sub> -I $\beta$ 3    | LOC100259863         | XM_002271029.4                   | XP_002271065.3                   | 15             | 0       | 389                 | 43.3                   | 8.82     | Lipase 3                       | -                    |
|                                     |                                   | VviPLA <sub>1</sub> -I $\gamma$ 1   | LOC100249474         | XM_002281871.3                   | XP_002281907.1                   | 7              | 1       | 514                 | 58.2                   | 7.07     | Lipase 3                       | Chloroplast          |
|                                     | II                                | VviPLA <sub>1</sub> -I $\gamma$ 2   | LOC100260417         | XM_002285331.3                   | XP_002285367.1                   | 6              | 0       | 502                 | 57.7                   | 8.59     | Lipase 3                       | Chloroplast          |
|                                     |                                   | VviPLA <sub>1</sub> -II $\gamma$ 1a | LOC100242927         | XM_002266946.3                   | XP_002266982.2                   | 10             | 2       | 369                 | 41.2                   | 6.73     | Lipase 3                       | Mitochondrial        |
|                                     |                                   | VviPLA <sub>1</sub> -II $\gamma$ 1b | LOC100242927         | XM_019222491.1                   | XP_019078036.1                   | 10             | 2       | 406                 | 45.5                   | 6.73     | Lipase 3                       | Mitochondrial        |
|                                     |                                   | VviPLA <sub>1</sub> -II $\gamma$ 2  | LOC100254098         | XM_019223761.1                   | XP_019079306.1                   | 12             | 3       | 403                 | 45.7                   | 8.93     | Lipase 3                       | Mitochondrial        |
|                                     | III                               | VviPLA <sub>1</sub> -II $\delta$    | LOC100267811         | XM_002281059.4                   | XP_002281095.2                   | 12             | 0       | 470                 | 53.1                   | 5.84     | Lipase 3                       | Chloroplast          |
|                                     |                                   | VviPLA <sub>1</sub> -III $\alpha$ 1 | LOC100266852         | XM_002272744.3                   | XP_002272780.2                   | 10             | 0       | 524                 | 59.7                   | 9.51     | Lipase 3                       | -                    |
|                                     |                                   | VviPLA <sub>1</sub> -III $\alpha$ 2 | LOC100242997         | XM_002272522.4                   | XP_002272558.2                   | 10             | 0       | 511                 | 58.8                   | 7.32     | Lipase 3                       | -                    |
| VviPLA <sub>1</sub> -III $\beta$ 1a |                                   | LOC100251427                        | XM_010657396.2       | XP_010655698.1                   | 10                               | 0              | 510     | 58.0                | 7.07                   | Lipase 3 | Chloroplast                    |                      |
| VviPLA <sub>1</sub> -III $\beta$ 1b |                                   | LOC100261664                        | XM_010657395.2       | XP_010655697.1                   | 10                               | 0              | 510     | 58.1                | 7.72                   | Lipase 3 | Chloroplast                    |                      |
| PA-preferring PLA <sub>1</sub>      | VviPA-PLA <sub>1</sub> - $\alpha$ | LOC100260107                        | XM_002275576.3       | XP_002275612.1                   | 18                               | 20             | 971     | 109.4               | 5.03                   | DDHD     | vacuole membrane / plasmodesma |                      |
|                                     | VviPA-PLA <sub>1</sub> - $\beta$  | LOC100260107                        | XM_010647575.2       | XP_010645877.1                   | 18                               | 20             | 963     | 108.5               | 5.02                   | DDHD     | vacuole membrane / plasmodesma |                      |
| Secretory PLA <sub>2</sub>          | VvisPLA <sub>2</sub>              | LOC100261227                        | XM_002282786.3       | XP_002282822.1                   | 11                               | 3              | 151     | 16.3                | 8.70                   | -        | integral component of membrane |                      |
| Patatin-like PLA                    | I                                 | VvipPLA-I $\alpha$                  | LOC104880454         | XM_010657059.2                   | XP_010655361.1                   | 10             | 18      | 1067                | 118.5                  | 5.88     | Arm / Patatin domain           | -                    |
|                                     |                                   | VvipPLA-I $\beta$                   | LOC104880454         | XM_019222598.1<br>XM_010657058.2 | XP_019078143.1<br>XP_010655360.1 | 10             | 18      | 1316                | 146.2                  | 5.83     | Arm / Patatin domain           | -                    |
|                                     | II                                | VvipPLA-II $\alpha$ 1a              | LOC100257463         | XM_002282445.3                   | XP_002282481.1                   | 18             | 6       | 413                 | 45.0                   | 5.97     | Patatin domain                 | Cytoplasm / membrane |
|                                     |                                   | VvipPLA-II $\alpha$ 1b              | LOC109121419         | XM_010666282.2                   | XP_010664584.1                   | 18             | 6       | 413                 | 45.1                   | 5.97     | Patatin domain                 | Cytoplasm / membrane |
|                                     |                                   | VvipPLA-II $\alpha$ 2               | LOC100266120         | XM_002282561.3                   | XP_002282597.1                   | 18             | 6       | 413                 | 45.0                   | 5.81     | Patatin domain                 | Cytoplasm / membrane |
|                                     |                                   | VvipPLA-II $\alpha$ 3               | LOC100241962         | XM_002284535.4                   | XP_002284571.1                   | 18             | 6       | 425                 | 46.5                   | 5.28     | Patatin domain                 | Cytoplasm / membrane |
|                                     |                                   | VvipPLA-II $\beta$ 1a               | LOC100252227         | XM_002282330.3                   | XP_002282366.2                   | 18             | 6       | 411                 | 45.4                   | 6.35     | Patatin domain                 | Cytoplasm / membrane |
|                                     |                                   | VvipPLA-II $\beta$ 1b               | LOC100264244         | XM_019216450.1                   | XP_019071995.1                   | 18             | 6       | 411                 | 45.3                   | 6.35     | Patatin domain                 | Cytoplasm / membrane |
|                                     |                                   | VvipPLA-II $\beta$ 2a               | LOC100248840         | XM_002282379.2                   | XP_002282415.2                   | 18             | 6       | 406                 | 44.9                   | 6.98     | Patatin domain                 | Cytoplasm / membrane |
|                                     |                                   | VvipPLA-II $\beta$ 2b               | LOC100260810         | XM_002282396.2                   | XP_002282432.1                   | 18             | 7       | 406                 | 44.9                   | 6.98     | Patatin domain                 | Cytoplasm / membrane |
|                                     |                                   | VvipPLA-II $\beta$ 3                | LOC100255738         | XM_002282404.1                   | XP_002282440.1                   | 18             | 6       | 406                 | 44.9                   | 5.95     | Patatin domain                 | Cytoplasm / membrane |
|                                     |                                   | VvipPLA-II $\beta$ 4a               | LOC100254055         | XM_019216314.1                   | XP_019071859.1                   | 18             | 7       | 406                 | 44.8                   | 8.86     | Patatin domain                 | Cytoplasm / membrane |
|                                     |                                   | VvipPLA-II $\beta$ 4b               | LOC100267749         | XM_019216433.1                   | XP_019071978.1                   | 18             | 6       | 406                 | 44.7                   | 8.85     | Patatin domain                 | Cytoplasm / membrane |
|                                     |                                   | VvipPLA-II $\gamma$ 1a              | LOC100260531         | XM_010653988.2                   | XP_010652290.1                   | 7              | 12      | 425                 | 47.0                   | 6.27     | Patatin domain                 | Cytoplasm / membrane |
|                                     |                                   | VvipPLA-II $\gamma$ 1b              | LOC100264086         | XM_002272007.3                   | XP_002272043.1                   | 7              | 6       | 426                 | 47.1                   | 6.33     | Patatin domain                 | Cytoplasm / membrane |
|                                     |                                   | VvipPLA-II $\gamma$ 2               | LOC100260531         | XM_002271666.3                   | XP_002271702.1                   | 7              | 12      | 424                 | 46.6                   | 9.21     | Patatin domain                 | Cytoplasm / membrane |
|                                     |                                   | VvipPLA-II $\delta$ 1               | LOC100249295         | XM_002281762.4                   | XP_002281798.1                   | 7              | 6       | 407                 | 44.0                   | 5.31     | Patatin domain                 | Cytoplasm / membrane |
|                                     |                                   | VvipPLA-II $\delta$ 2               | LOC100245674         | XM_002277282.3                   | XP_002277318.1                   | 7              | 6       | 402                 | 44.2                   | 5.48     | Patatin domain                 | Cytoplasm / membrane |
|                                     |                                   | VvipPLA-II $\delta$ 3               | LOC100250815         | XM_002277269.2                   | XP_002277305.1                   | 7              | 7       | 407                 | 44.5                   | 5.86     | Patatin domain                 | Cytoplasm / membrane |
|                                     |                                   | VvipPLA-II $\epsilon$ 1             | LOC100244172         | XM_002262906.3                   | XP_002262942.1                   | unknown        | 5       | 397                 | 43.6                   | 5.96     | Patatin domain                 | Cytoplasm / membrane |
|                                     |                                   | VvipPLA-II $\epsilon$ 2             | LOC100262840         | XM_019221012.1                   | XP_019076557.1                   | 7              | 6       | 398                 | 44.1                   | 7.16     | Patatin domain                 | Cytoplasm / membrane |
|                                     |                                   | III                                 | VvipPLA-III $\alpha$ | LOC100252820                     | XM_002276301.3                   | XP_002276337.2 | 10      | 1                   | 484                    | 52.4     | 9.18                           | Patatin domain       |
|                                     | VvipPLA-III $\beta$               |                                     | LOC100246118         | XM_010660108.2<br>XM_019224348.1 | XP_010658410.1<br>XP_019079893.1 | 13             | 4       | 458                 | 49.7                   | 6.91     | Patatin domain                 | -                    |
|                                     | VvipPLA-III $\delta$              |                                     | LOC100263127         | XM_002277845.4                   | XP_002277881.1                   | 7              | 1       | 385                 | 42.0                   | 8.85     | Patatin domain                 | -                    |

**Supplementary Table S3** - General features of grapevine PLA superfamily. Proposed grapevine PLA nomenclature, gene locus, protein and nucleotide accessions (from NCBI and CRIBI), chromosome locations, intron number, protein length, molecular weight, isoelectric point (pI), domain and subcellular prediction are represented.

| PLA gene                    | Nucleotide     | PLA Location (Mb) | Chr. | <i>Rpv</i>   | RPV Location (Mb) | Associated marker            | References                                           |
|-----------------------------|----------------|-------------------|------|--------------|-------------------|------------------------------|------------------------------------------------------|
| <i>VviPLA1-Iα</i>           | XM_002268106.2 | 20.6              | 5    | <i>Rpv14</i> |                   | GF05-13                      | Ochssner et al. 2016                                 |
| <i>VviPLA1-Iα2</i>          | XM_002281871.3 | 0.2               |      |              |                   |                              |                                                      |
| <i>VviPLA1-Iγ1</i>          | XM_002277845.4 | 1.3               |      | <i>Rpv7</i>  | 11.4              | UDV-097                      | Bellin et al. 2009                                   |
| <b><i>VvipPLA-IIδ3*</i></b> | XM_002277269.2 | 17                |      |              |                   |                              |                                                      |
| <b><i>VvipPLA-IIδ2*</i></b> | XM_002277282.3 | 17                | 7    |              |                   |                              |                                                      |
| <b><i>VvipPLA-IIδ1*</i></b> | XM_002281762.4 | 17                |      | <i>Rpv9</i>  | 16.6              | CCoAOMT                      | Moreira et al. 2011                                  |
| <i>VvipPLA-IIγ1a</i>        | XM_010653988.2 | 4.3               |      |              |                   |                              |                                                      |
| <i>VvipPLA-IIγ1b</i>        | XM_002272007.3 | 4.3               |      |              |                   |                              |                                                      |
| <i>VviPLA1-IIδ</i>          | XM_002281059.4 | 2.6               |      | <i>Rpv1</i>  | 10.3              | VVIb32                       | Merdinoglu et al. 2003                               |
|                             |                |                   | 12   | <i>Rpv6</i>  | 20.4              | VMC8G9                       | Marguerit et al. 2009                                |
| <i>VviPLA1-IIγ2</i>         | XM_019223761.1 | 3.1               |      | <i>Rpv13</i> | 10.0              | VMC1G3.2                     | Moreira et al. 2011                                  |
| <i>VviPA-PLA1-α</i>         | XM_002275576.3 | 0.9               |      |              |                   |                              |                                                      |
| <i>VviPA-PLA1-β</i>         | XM_010647575.2 | 0.9               |      |              |                   |                              |                                                      |
| <i>VvipPLA-IIα3</i>         | XM_002284535.4 | 9.1               |      | <i>Rpv2</i>  |                   |                              | Wiedemann-Merdinoglu et al. 2006; Bellin et al. 2009 |
| <i>VvipPLA-IIα2</i>         | XM_002282561.3 | 9.1               |      |              |                   |                              |                                                      |
| <i>VvipPLA-IIα1b</i>        | XM_010666282.2 | 9.1               |      |              |                   |                              |                                                      |
| <i>VvipPLA-IIβ4a*</i>       | XM_019216314.1 | 9.1               |      |              |                   |                              |                                                      |
| <i>VvipPLA-IIα1a</i>        | XM_002282445.3 | 9.2               | 18   | <i>Rpv3</i>  | 24.9<br>26.9      | UDV-112<br>UDV-305<br>VMC7f2 | Welter et al. 2007;<br>Bellin et al. 2009            |
| <i>VvipPLA-IIβ3</i>         | XM_002282404.1 | 9.2               |      |              |                   |                              |                                                      |
| <i>VvipPLA-IIβ2b</i>        | XM_002282396.2 | 9.2               |      |              |                   |                              |                                                      |
| <i>VvipPLA-IIβ2a</i>        | XM_002282379.2 | 9.2               |      |              |                   |                              |                                                      |
| <i>VvipPLA-IIβ1b</i>        | XM_019216450.1 | 9.3               |      | <i>Rpv15</i> |                   |                              | Pap et al. (in preparation)                          |
| <i>VvipPLA-IIβ1a</i>        | XM_002282330.3 | 9.3               |      |              |                   |                              |                                                      |

**Supplementary Table S4** - Grapevine PLA genes and chromosomal location of “Resistance to *Plasmopara viticola* (*Rpv*)” loci. Bold indicate PLA selected for further studies, bold and asterisks indicate the PLA with putative involvement in defence.

| Gene name                           | Abbreviation     | NCBI Accession Number  | Primer Sequence                                          | Amplicon length (bp)                                  | Ta (°C)                                            | Tm (°C) | Amplification efficiency (E) |      |
|-------------------------------------|------------------|------------------------|----------------------------------------------------------|-------------------------------------------------------|----------------------------------------------------|---------|------------------------------|------|
| <b>Elongation Factor 1-alpha</b>    | <i>EF1α</i>      | XM_002284888.2         | Fw: GAACTGGGTGCTTGATAGGC<br>Rev: ACCAAAATATCCGGAGTAAAAGA | 149                                                   | 60                                                 | 79.45   | 1.89                         |      |
| <b>Ubiquitin-conjugating enzyme</b> | <i>UBQ</i>       | XM_002284161.3         | Fw: GAGGGTCGTCAGGATTTGGA<br>Rev: GCCCTGCACTTACCATCTTTAAG | 75                                                    | 60                                                 | 78.65   | 1.97                         |      |
| <b>Phospholipase A1</b>             | <b>Group I</b>   | <i>VviPLA1-Iβ1</i>     | XM_002270956.4                                           | Fw: TCCCTAGTGCTCATTCCGAT<br>Rev: TTGAAGAAGACTGGCGACCT | 122                                                | 58      | 78.81                        | 2.05 |
|                                     |                  | <i>VviPLA1-Iγ1</i>     | XM_002281871.3                                           | Fw: ACTGCGGGACCTGTAGATTT<br>Rev: TTAGCCATCGGGACTTCTT  | 142                                                | 60      | 80.53                        | 2.00 |
|                                     | <b>Group II</b>  | <i>VviPLA1-IIδ</i>     | XM_002281059.4                                           | Fw: ATGAGGAGGGGAGTAGCAG<br>Rev: TCTGGGGTCACCTGAAGTG   | 104                                                | 60      | 77.17                        | 1.94 |
| <b>Secretory Phospholipase A2</b>   | <i>VvisPLA2</i>  | XM_002282786.3         | FW: CAGGTGCGCCAATAGGACA<br>Rev: CGGCGACTGCGAAGAAGAA      | 89                                                    | 60                                                 | 81.71   | 1.91                         |      |
| <b>Patatin-like phospholipase A</b> | <b>Group I</b>   | <i>VvipPLA-Iα*</i>     | XM_010657059.2                                           | FW: TTGTGCCTGAACCCCGTGT<br>Rev: CCTTTCTTCCCAACCTGTCT  | 109                                                | 60      | 80.48                        | 2.06 |
|                                     | <b>Group II</b>  | <i>VvipPLA-IIα1/2*</i> | XM_002282445.3                                           | FW: TTCATACCTCCATCGCTCC<br>Rev: CCTCTTATTCCACCTCCAT   | Not detected due to the low presence of transcript |         |                              |      |
|                                     |                  | <i>VvipPLA-IIβ*</i>    | XM_019216314.1                                           | FW: CTGCAGCACCAACATACTTT<br>Rev: CTGCGACACCACCATCAATA | 96                                                 | 58      | 75.59                        | 1.90 |
|                                     |                  | <i>VvipPLA-IIδ1</i>    | XM_002281762.4                                           | FW: ATAACAACGGGTCCACTCCA<br>Rev: ATCCGAGGGCCTGAAATACA | Not detected due to the low presence of transcript |         |                              |      |
|                                     |                  | <i>VvipPLA-IIδ2</i>    | XM_002277282.3                                           | FW: GACTCCGTGAGTCAATGGC<br>Rev: TGGGGTGAAGAAGTGGTCAA  | 116                                                | 60      | 75.57                        | 2.02 |
|                                     |                  | <i>VvipPLA-IIδ3</i>    | XM_002277269.2                                           | FW: CGGAATCAAGCCTTTTACC<br>Rev: TCATATTTTGGCCCTGTTAG  | Not detected due to the low presence of transcript |         |                              |      |
|                                     | <b>Group III</b> | <i>VvipPLA-IIIβ</i>    | XM_010660108.2<br>XM_019224348.1                         | FW: ACGTTGAAGCCGGTGTGAT<br>Rev: GGAAGTCGAAGCTGTCTGTT  | 100                                                | 60      | 82.6                         | 1.92 |

**Supplementary Table S5** - Reference and target genes transcripts primer sequences, amplicon length, amplification efficiency, annealing and melting temperature are represented.
